# Supplementary material for: One-pot preparation of a MnO2–graphene–carbon nanotube hybrid material for the removal of methyl orange from aqueous solutions
Source: Royal Society of Chemistry journal article supplement (doi:10.1039/c5nj00697j), 2015-01-01
Supplement: c5nj00697j1.pdf [file c5nj00697j1.pdf]

**Supporting Information for**  
**One-pot preparation of MnO<sub>2</sub>/graphene-carbon nanotube hybrid**  
**material for the removal of methyl orange from aqueous solutions**

Yan Liu<sup>a</sup>, Yaxi Tian<sup>a</sup>, Chao Luo<sup>a,b</sup>, Guijia Cui<sup>a</sup>, Shiqiang Yan<sup>\*a</sup>

<sup>a</sup> *College of Chemistry and Chemical Engineering, Lanzhou University, Lanzhou*  
*730000, PR China*

<sup>b</sup> *CNOOC Tianjin Chemical Research & Design Institute, Tianjin 30000, PR China*

---

\*Corresponding author. Tel./fax: +86 931 8912582  
E-mail address: [yansq@lzu.edu.cn](mailto:yansq@lzu.edu.cn) (S. Yan)

## Isotherm Model

The Langmuir model assumes a monolayer adsorption onto a homogeneous surface with a finite number of identical sites. Its linearized form is represented by the following equation <sup>1</sup>:

$$\frac{C_e}{q_e} = \frac{1}{bq_m} + \frac{C_e}{q_m}$$

(1)

where  $C_e$  (mg L<sup>-1</sup>) is the solute equilibrium concentration,  $q_e$  (mg g<sup>-1</sup>) is the amount of dye adsorbed per unit mass of the adsorbent at the equilibrium point, and  $q_m$  (mg g<sup>-1</sup>) and  $b$  (L mg<sup>-1</sup>) are the Langmuir constants related to the maximum adsorbate amount and adsorption affinity of the binding sites. When  $C_e/q_e$  is plotted versus  $C_e$ , the  $q_m$  and  $b$  constants can be determined from the slope and the intercept. Another parameter,  $R_L$ , called separation factor or equilibrium parameter, which can be used to express the efficiency of the adsorption, is defined as <sup>2</sup>

$$R_L = \frac{1}{1 + bC_0}$$

(2)

where  $b$  (L mg<sup>-1</sup>) is the Langmuir constant, and  $C_0$  (mg L<sup>-1</sup>) is the initial MO concentration. The values of  $R_L$  express the isotherm shapes which can be unfavorable ( $R_L > 1$ ), linear ( $R_L = 1$ ), favorable ( $0 < R_L < 1$ ) or irreversible ( $R_L = 0$ ).

The Freundlich model can be considered to describe heterogeneous surfaces and multilayer adsorption systems, which can be given as follows:<sup>3</sup>

$$\ln q_e = \ln K_F + \frac{1}{n} \ln C_e \quad (3)$$

where  $q_e$  and  $C_e$  have the same definitions as those in the Langmuir equation cited above, and  $K_F$  and  $n$  are the Freundlich constants that indicate the adsorption capacity and the adsorption intensity, respectively. They can be obtained from the intercept and slope of the linear plot of  $\ln q_e$  versus  $\ln C_e$ .

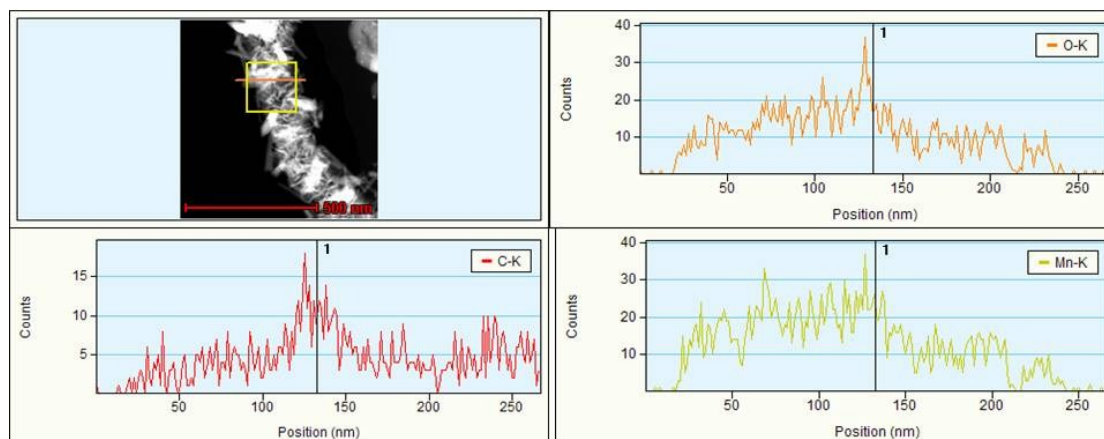

**Fig. S1** The line scan results for C, Mn and O elements in the hybrid.

From Fig. S1, we can see that the edge of the curved petal-like sheets (in  $\sim 250$  nm) is composed of only carbon without Mn and O, implying that the nanosheets are exactly graphene sheets.

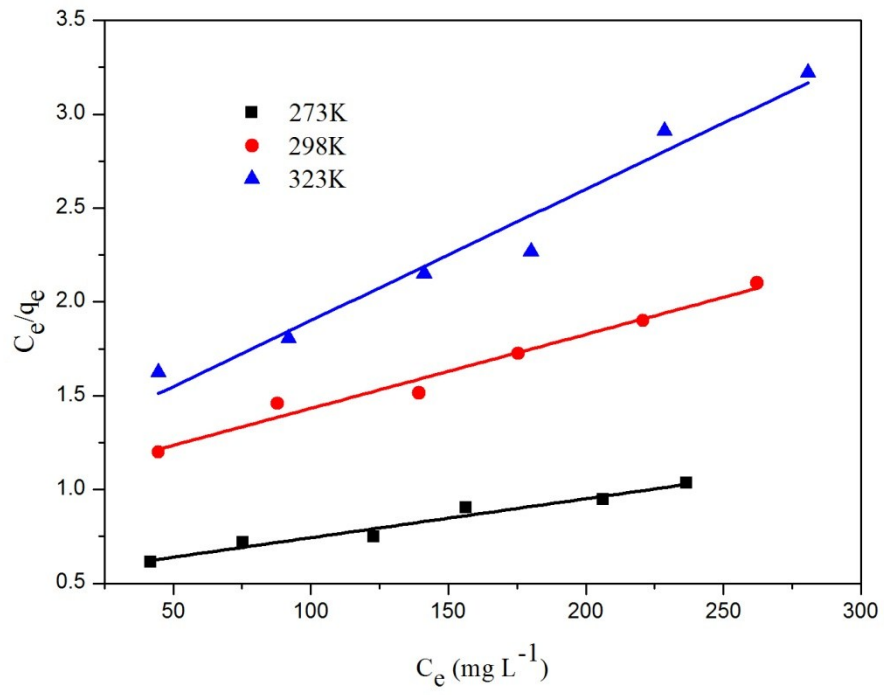

**Fig. S2** Langmuir adsorption isotherm plots for MO adsorption onto MnO<sub>2</sub>/G-CNT hybrid material.

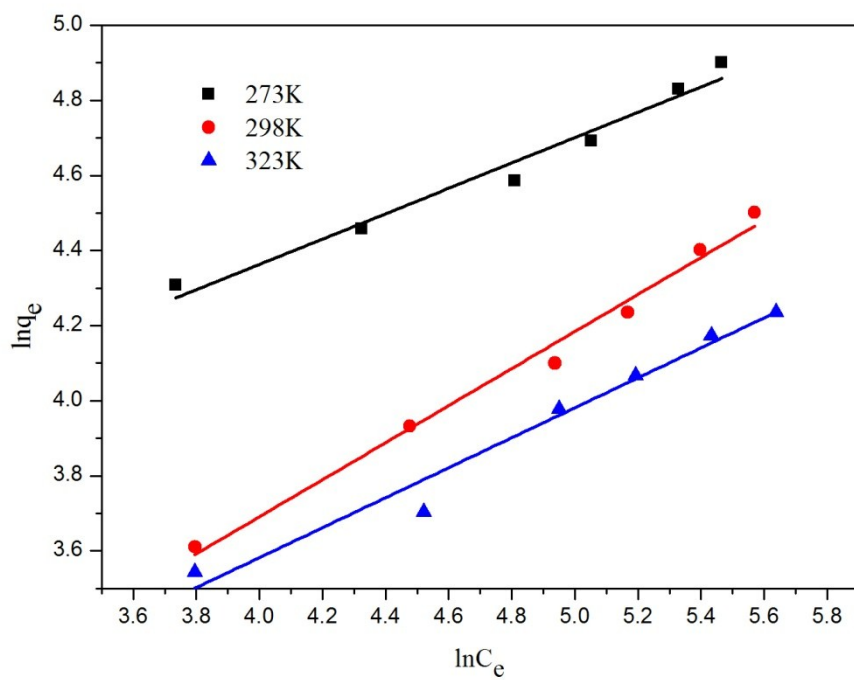

**Fig. S3** Freundlich adsorption isotherm plots for MO adsorption onto MnO<sub>2</sub>/G-CNT hybrid material.

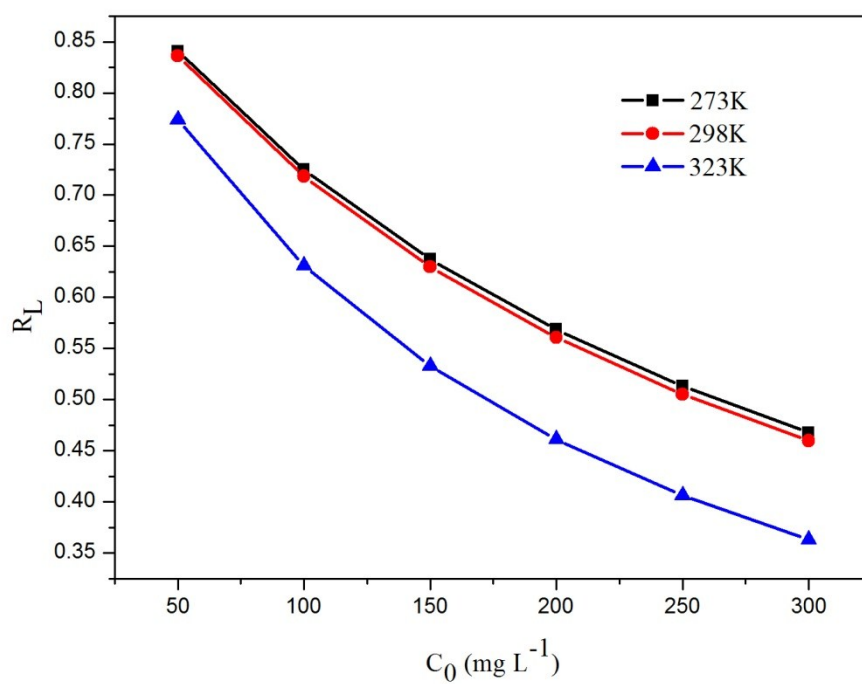

**Fig. S4** Separation factor of MO adsorbed onto  $\text{MnO}_2/\text{G-CNT}$  hybrid material at different temperatures.

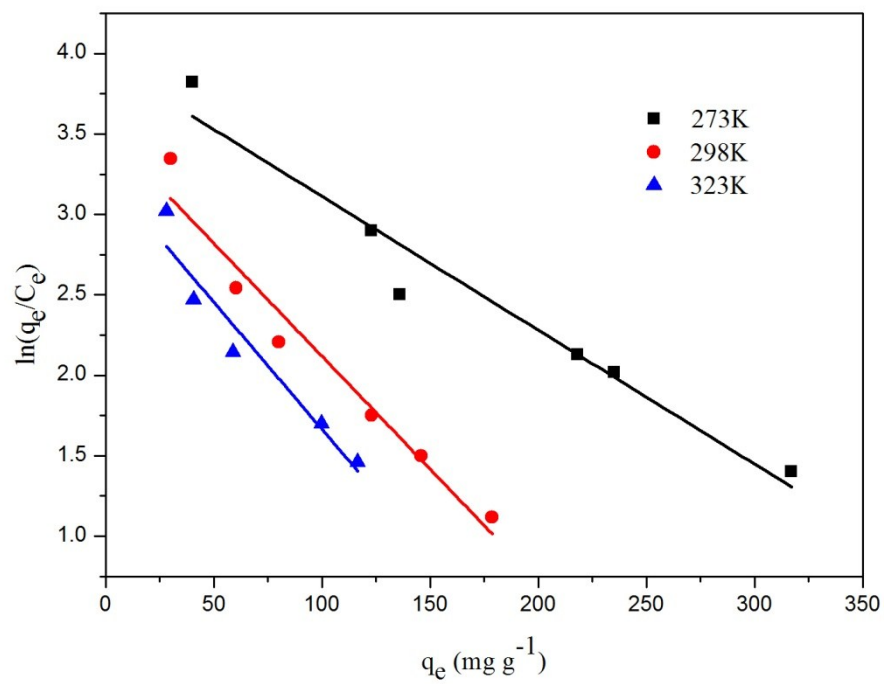

**Fig. S5** Plots of  $\ln q_e/C_e$  vs.  $q_e$  for calculation of thermodynamic parameters.



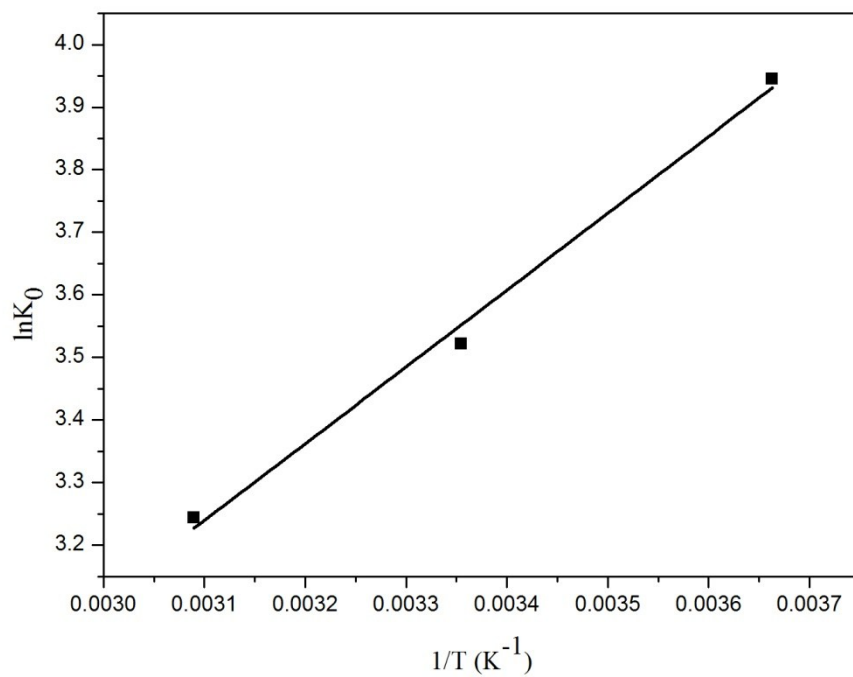

**Fig. S6** Van't Hoff plot for the adsorption of MO onto MnO<sub>2</sub>/G-CNT hybrid material.

### References

1. I. Langmuir, *J. Am. Chem. Soc.*, 1918, **40**, 1361-1403.
2. Kenneth R. Hall, Lee C. Eagleton, Andreas Acrivos and T. Vermeulen, *Ind. Eng. Chem. Fundam.*, 1966, **5**, 212-223.
3. M. Ahmaruzzaman and S. Laxmi Gayatri, *Chem. Eng. J.*, 2010, **158**, 173-180.
